# Supplementary material for: Electrochemical heavy metal removal from water using PVC waste-derived N, S co-doped carbon materials
Source: Royal Society of Chemistry journal article supplement (doi:10.1039/c9ra09237d), 2020-01-01
Supplement: c9ra09237d1.pdf [file c9ra09237d1.pdf]

**Supporting information for**

**Electrochemical heavy metal removal from water using PVC waste-derived N, S codoped carbon materials**

Yingna Chang<sup>a,†</sup>, Qidong Dang<sup>b,†</sup>, Imran Samo<sup>a</sup>, Yaping Li<sup>a</sup>, Xuejin Li<sup>b</sup>, Guoxin Zhang<sup>b,\*</sup>, and Zheng Chang<sup>a,\*</sup>

<sup>a</sup> State Key Laboratory of Chemical Resource Engineering, Beijing University of Chemical Technology, Beijing, 100029, China

<sup>b</sup> College of Electrical Engineering and Automation, Shandong University of Science and Technology, Qingdao 266590, China

\* Correspondence to G.X. Zhang ([zhanggx@sdust.edu.cn](mailto:zhanggx@sdust.edu.cn)) or Z. Chang ([changzheng@mail.buct.edu.cn](mailto:changzheng@mail.buct.edu.cn))

† These authors contributed equally to this work.

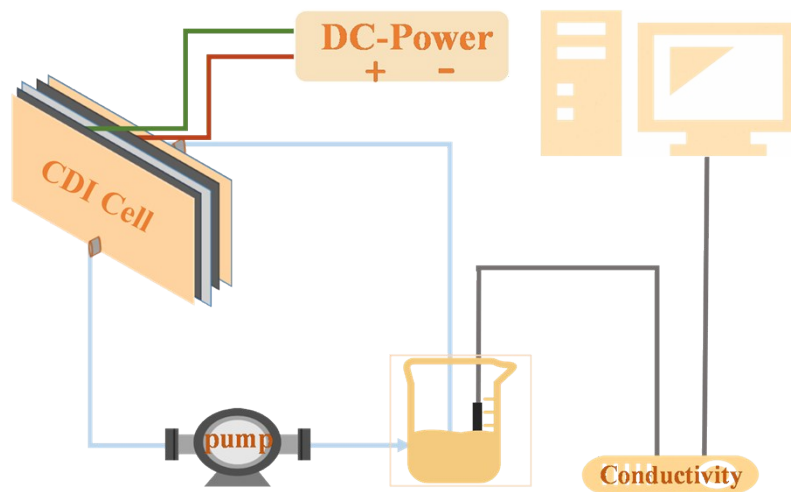

**Figure S1.** Scheme of integrated capacitive deionization apparatus.

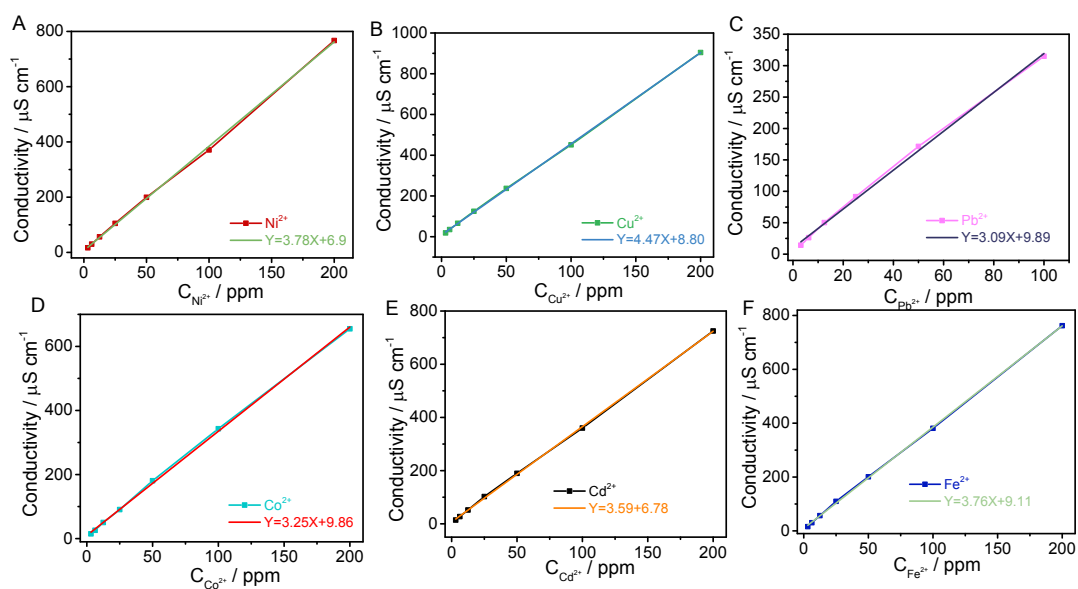

**Figure S2.** Plots of conductivity of solutions containing different types of metal ions versus the concentration of metal ions, the concentration of metal ions was measured by ICP techniques.

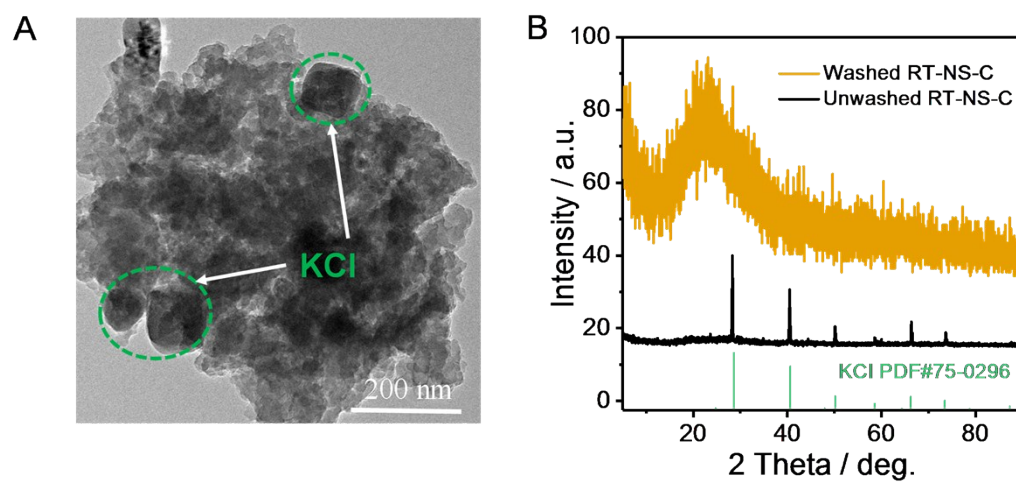

**Figure S3.** (A) TEM image of RT-NS-C. (B) XRD profiles of RT-NS-C before and after washing.

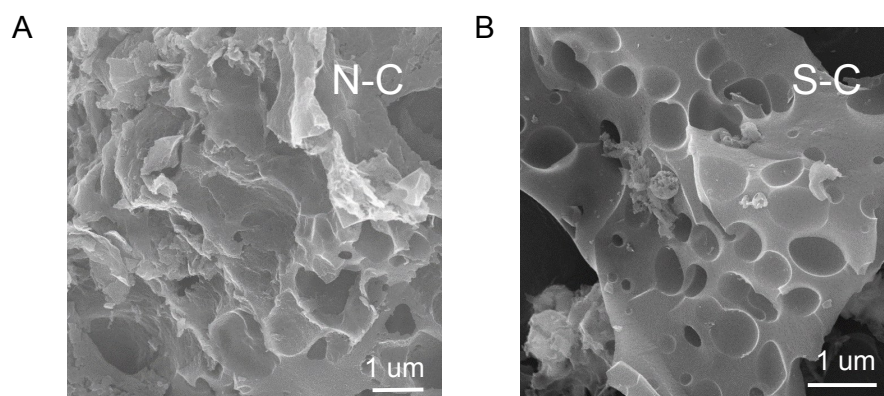

**Figure S4.** SEM images of (A) N-C and (B) S-C.

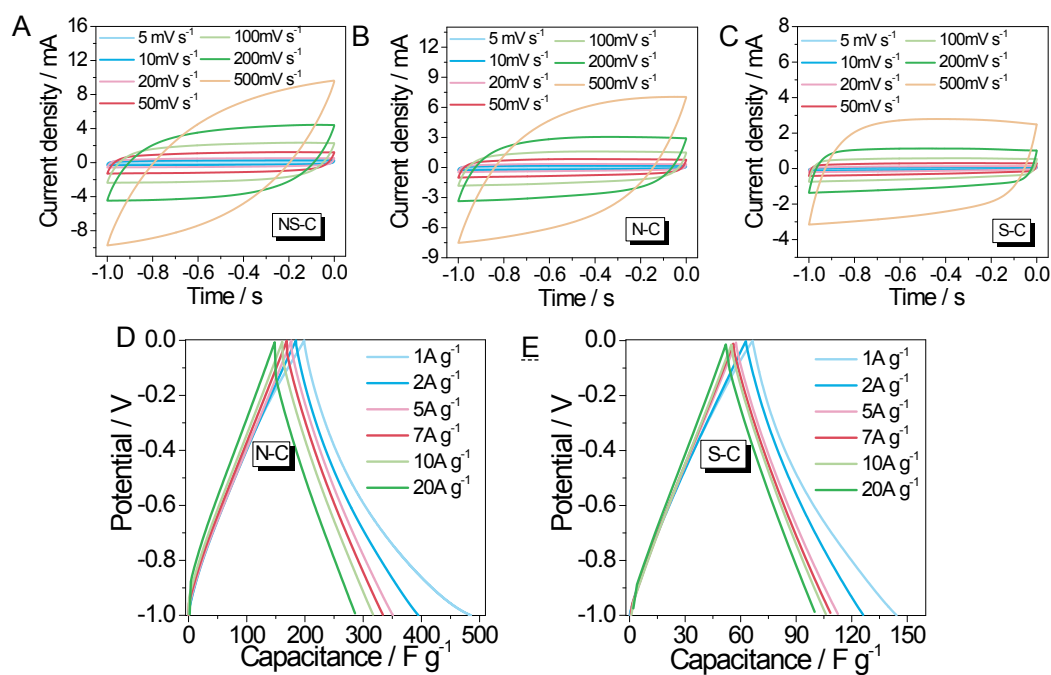

**Figure S5.** Supercapacitor measurements of NS-C/N-C/S-C in 1.0 M Na<sub>2</sub>SO<sub>4</sub> solution. (A-C) CV profiles at scan rate from 5 mV s<sup>-1</sup> to 100 mV s<sup>-1</sup>, (A) NS-C, (B) N-C, and (C) S-C. (D-E) charge/discharge curves at different current. (D) N-C, and (E) S-C.

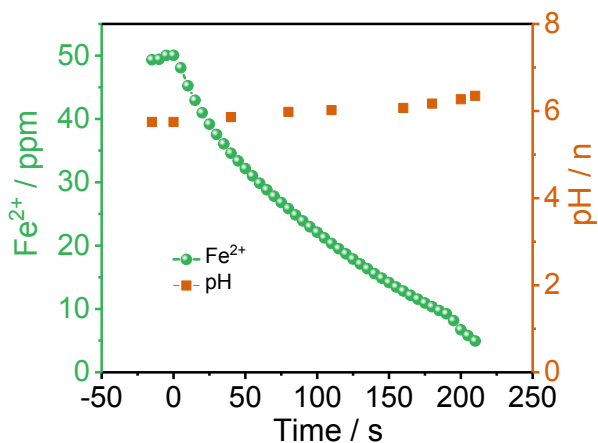

**Figure S6.** Deionization curves of Fe<sup>2+</sup>, and the corresponding pH value.

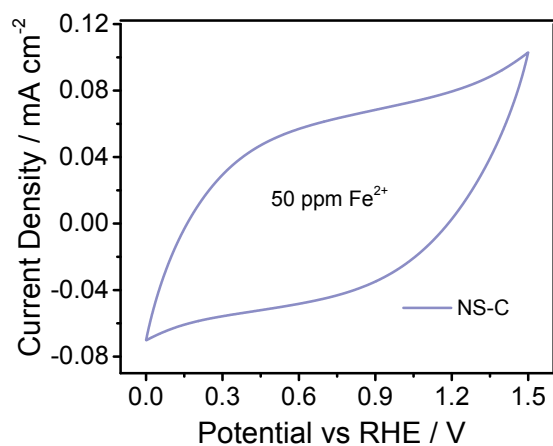

**Figure S7.** The cycle voltammograms curves of NS-C in 50 ppm  $\text{FeCl}_2$ , scan rate = 5  $\text{mV s}^{-1}$ .

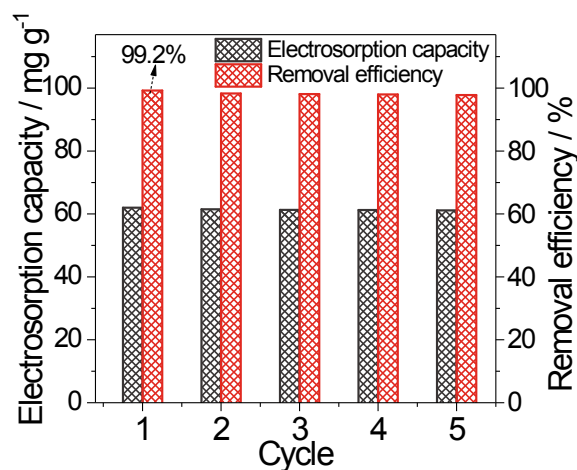

**Figure S8.** Adsorption capacities and efficiencies for  $\text{Fe}^{2+}$  from cycle 1 to 5.

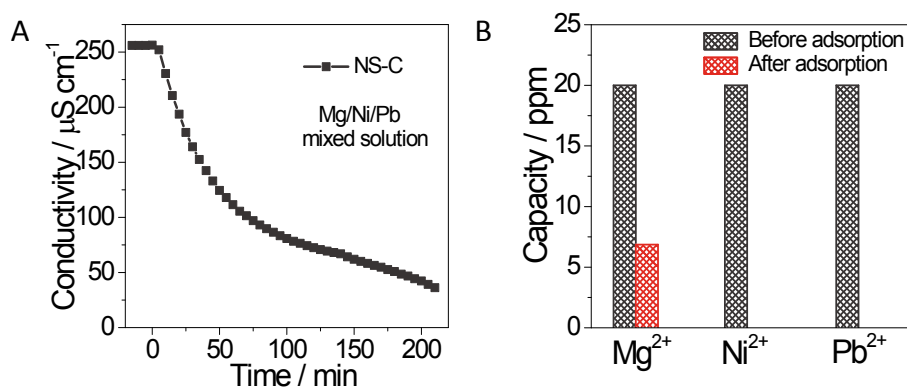

**Figure S9.** (A) Deionization curve of NS-C in the mixed solution of  $\text{Mg}^{2+}/\text{Ni}^{2+}/\text{Pb}^{2+}$  ions, and (B) ion concentrations in the mixed solution before and after deionization.

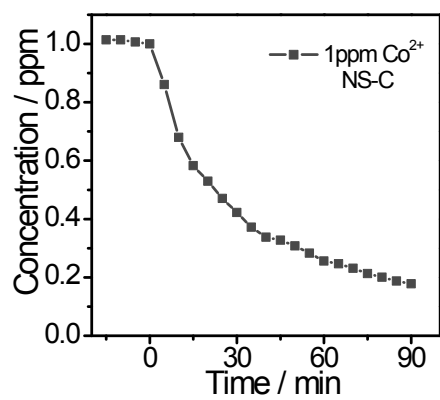

**Figure S10.** Deionization curve of 1 ppm Co<sup>2+</sup> using NS-C electrode.
